# Supplementary material for: Activation peptide of the coagulation factor XIII (AP-F13A1) as a new biomarker for the screening of colorectal cancer
Source: PubMed Central journal article supplement (PMC5890357; doi:10.1186/s12014-018-9191-3), 2018-04-09
Supplement: 12014_2018_9191_MOESM2_ESM.pdf [file 12014_2018_9191_MOESM2_ESM.pdf]

## **Additional file 2**

# **Table of synthetic light and heavy stables isotope for tAP-F13A1 during inclusion mass screening and PRM-based assays**

**a** - LTQ Orbitrap settings maximized for a better detection of tAP-F13A1

**b** - Q-Exactive settings maximized for a better detection of tAP-F13A1

**a**

| TAP-F13A1 isoforms                                                                                                                                                                   |  | Classification | Precursor [M]                                | Type of fragmentation | Collision energy | MS resolution              | MS/MS resolution        | Isolation width (m/z) |
|--------------------------------------------------------------------------------------------------------------------------------------------------------------------------------------|--|----------------|----------------------------------------------|-----------------------|------------------|----------------------------|-------------------------|-----------------------|
| AVPPNNSNAAEDDLPTVELQGVVPR                                                                                                                                                            |  | Light          | 1301.659 ++                                  | HCD                   | 40               | 15,000                     | 7,500                   | 3                     |
| AVPPNNSNAAEDDL( <sup>13</sup> C <sub>6</sub> <sup>15</sup> N)PTVEL( <sup>13</sup> C <sub>6</sub> <sup>15</sup> N)QGVVPR( <sup>13</sup> C <sub>6</sub> <sup>15</sup> N <sub>4</sub> ) |  | Heavy          | 868.1084 +++<br>1313.6803 ++<br>876.1226 +++ | HCD<br>HCD<br>HCD     | 35<br>40<br>35   | 15,000<br>15,000<br>15,000 | 7,500<br>7,500<br>7,500 | 3<br>3<br>3           |
| AVPPNNSNAAEDDLPTVELQGLVPR                                                                                                                                                            |  | Light          | 1308.6668 ++                                 | HCD                   | 40               | 15,000                     | 7,500                   | 3                     |
| AVPPNNSNAAEDDLPTVEL( <sup>13</sup> C <sub>6</sub> <sup>15</sup> N)QGL( <sup>13</sup> C <sub>6</sub> <sup>15</sup> N)VPR( <sup>13</sup> C <sub>6</sub> <sup>15</sup> N <sub>4</sub> ) |  | Heavy          | 872.7803 +++<br>1320.6881 ++<br>880.7945 +++ | HCD<br>HCD<br>HCD     | 35<br>40<br>35   | 15,000<br>15,000<br>15,000 | 7,500<br>7,500<br>7,500 | 3<br>3<br>3           |

**b**

| TAP-F13A1 isoforms                                                                                                                                                                   |  | Classification | Precursor [M]                                | Type of fragmentation | Collision energy | MS/MS resolution           | Isolation width (m/z) |
|--------------------------------------------------------------------------------------------------------------------------------------------------------------------------------------|--|----------------|----------------------------------------------|-----------------------|------------------|----------------------------|-----------------------|
| AVPPNNSNAAEDDLPTVELQGVVPR                                                                                                                                                            |  | Light          | 1301.659 ++                                  | HCD                   | 29               | 35,000                     | 3                     |
| AVPPNNSNAAEDDL( <sup>13</sup> C <sub>6</sub> <sup>15</sup> N)PTVEL( <sup>13</sup> C <sub>6</sub> <sup>15</sup> N)QGVVPR( <sup>13</sup> C <sub>6</sub> <sup>15</sup> N <sub>4</sub> ) |  | Heavy          | 868.1084 +++<br>1313.6803 ++<br>876.1226 +++ | HCD<br>HCD<br>HCD     | 25<br>29<br>25   | 35,000<br>35,000<br>35,000 | 3<br>3<br>3           |
| AVPPNNSNAAEDDLPTVELQGLVPR                                                                                                                                                            |  | Light          | 1308.6668 ++                                 | HCD                   | 29               | 35,000                     | 3                     |
| AVPPNNSNAAEDDLPTVEL( <sup>13</sup> C <sub>6</sub> <sup>15</sup> N)QGL( <sup>13</sup> C <sub>6</sub> <sup>15</sup> N)VPR( <sup>13</sup> C <sub>6</sub> <sup>15</sup> N <sub>4</sub> ) |  | Heavy          | 872.7803 +++<br>1320.6881 ++<br>880.7945 +++ | HCD<br>HCD<br>HCD     | 25<br>29<br>25   | 35,000<br>35,000<br>35,000 | 3<br>3<br>3           |
