# Supplementary material for: Activation peptide of the coagulation factor XIII (AP-F13A1) as a new biomarker for the screening of colorectal cancer
Source: PubMed Central journal article supplement (PMC5890357; doi:10.1186/s12014-018-9191-3), 2018-04-09

## **Additional file 3**

# **MS/MS Spectra from the Mascot DAT file imported in Skyline software as MS/MS library**

MS/MS spectra of the two isoforms of tAP-F13A1 obtained from serum samples using the C18 solid phase extraction.

**a** - MS/MS spectrum of tAP-F13A1 AVPPNNSNAAEDDLPTVELQGVVPR with the precursor ion M at m/z 1301.6590 ++

**b** - MS/MS spectrum of tAP-F13A1 AVPPNNSNAAEDDLPTVELQGVVPR with the precursor ion M at m/z 868.1084 +++

**c** - MS/MS spectrum of tAP-F13A1 AVPPNNSNAAEDDLPTVELQGLVPR with the precursor ion M at m/z 1308.6680 ++

**d** - MS/MS spectrum of tAP-F13A1 AVPPNNSNAAEDDLPTVELQGLVPR with the precursor ion M at m/z 872.7803 +++

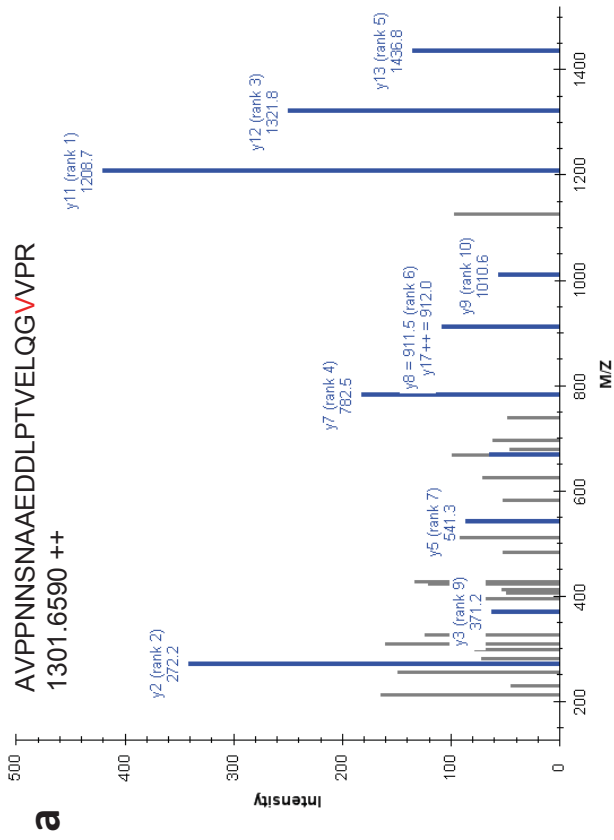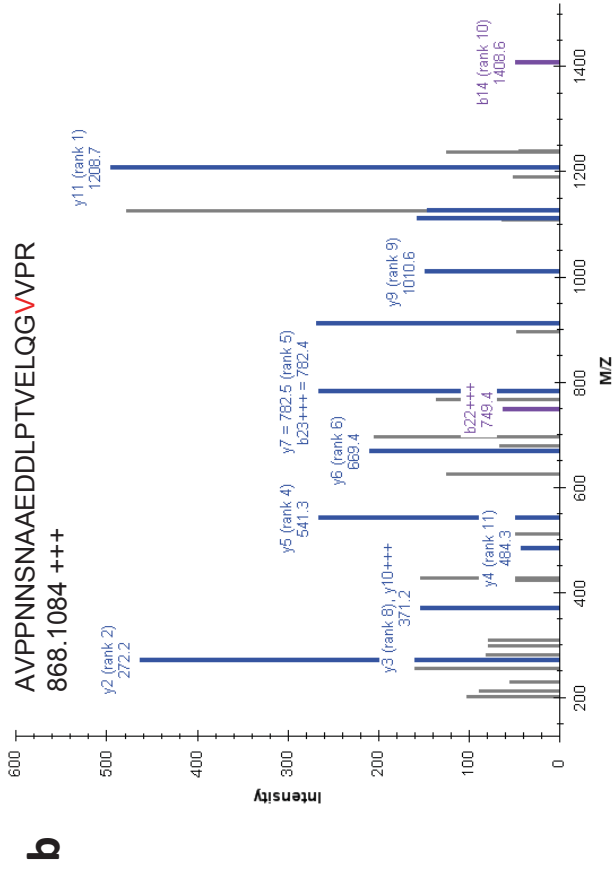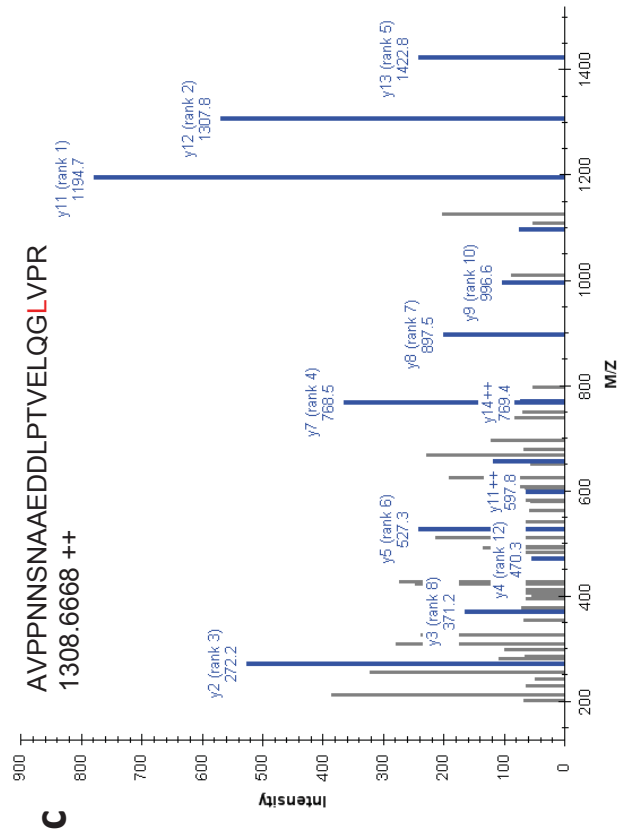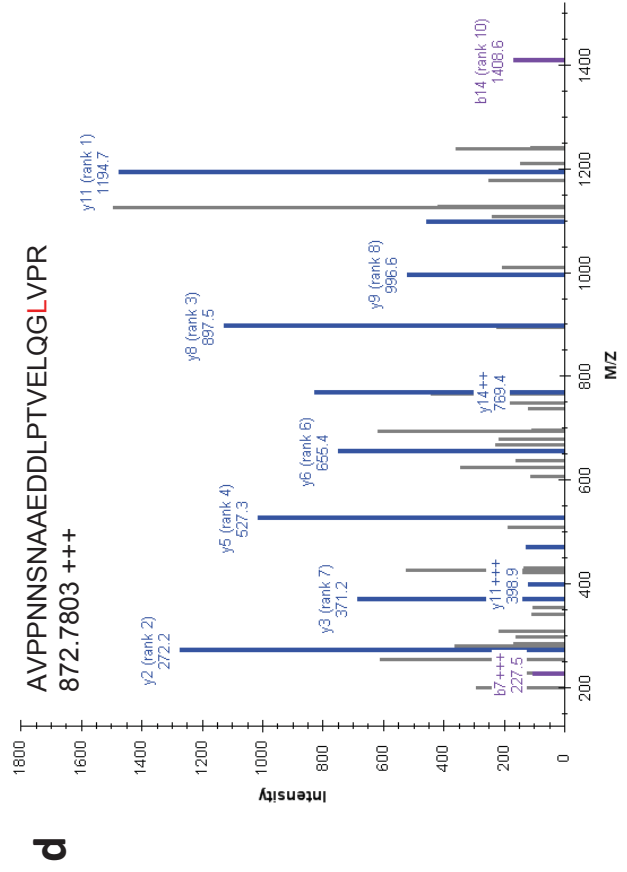

Supplement: 12014_2018_9191_MOESM3_ESM.pdf [file 12014_2018_9191_MOESM3_ESM.pdf]
