# Supplementary material for: Activation peptide of the coagulation factor XIII (AP-F13A1) as a new biomarker for the screening of colorectal cancer
Source: PubMed Central journal article supplement (PMC5890357; doi:10.1186/s12014-018-9191-3), 2018-04-09
Supplement: 12014_2018_9191_MOESM5_ESM.pdf [file 12014_2018_9191_MOESM5_ESM.pdf]

## Additional file 5

### Representative mass spectra of the AP-F13A1 activation peptide

**a** - Annotated MS/MS spectrum of the Acetyl-SETSRTAFGGRRVPPNNSNAAEDDLPTVELQGVVPR peptide ( $MH^+ = 3,949.981$ ,  $m/z = 988.251$  ( $z=4$ )), identified as the first largest form of the activation peptide of the coagulation factor XIII (AP-F13A1)

**b** - Annotated MS/MS spectrum of the Acetyl-SETSRTAFGGRRVPPNNSNAAEDDLPTVELQGLVPR peptide ( $MH^+ = 3,963.9938$ ,  $m/z = 991.753$  ( $z=4$ )), identified as the second largest form of the AP-F13A1

**c** - Annotated MS/MS spectrum of the TAFGGRRVPPNNSNAAEDDLPTVELQGVVPR peptide ( $MH^+ = 3,347.710$ ,  $m/z = 837.683$  ( $z=4$ )), identified as one of the intermediate form of the AP-F13A1

**d** - Annotated MS/MS spectrum of the TAFGGRRVPPNNSNAAEDDLPTVELQGL VPR peptide ( $MH^+ = 3,361.723$ ,  $m/z = 841.186$  ( $z=4$ )), identified as one of the intermediate form of the AP-F13A1

**e** - Annotated MS/MS spectrum of the RAVPPNNSNAAEDDLPTVELQGVVPR peptide ( $MH^+ = 2,758.408$ ,  $m/z = 920.141$  ( $z=3$ )), identified as one of the intermediate form of the AP-F13A1

**f** - Annotated MS/MS spectrum of the RAVPPNNSNAAEDDLPTVELQGLVPR peptide ( $MH^+ = 2,772.428$ ,  $m/z = 924.814$  ( $z=3$ )), identified as one of the intermediate form of the AP-F13A1

**g** - Annotated MS/MS spectrum of the AVPPNNSNAAEDDLPTVELQGVVPR peptide ( $MH^+ = 2,602.314$ ,  $m/z = 868.109$  ( $z=3$ )), identified as the shortest form of the AP-F13A1

**h** - Annotated MS/MS spectrum of the AVPPNNSNAAEDDLPTVELQGLVPR peptide ( $MH^+ = 2,616.322$ ,  $m/z = 872.779$  ( $z=3$ )), identified as the shortest form of the AP-F13A1





C

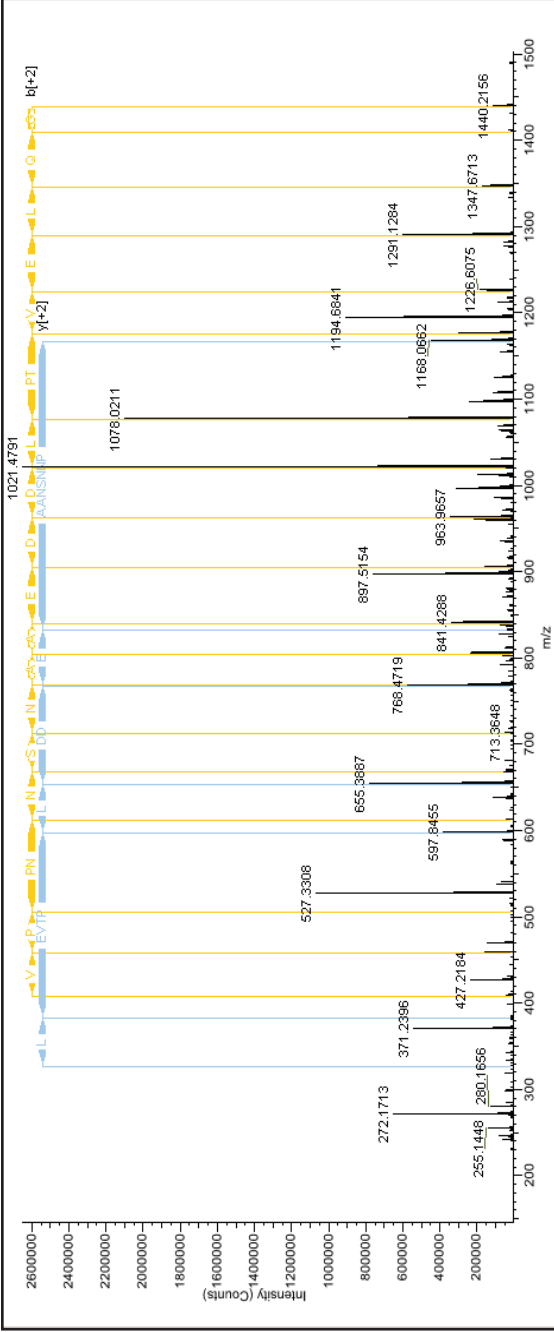

T A F G R R A V J P P N J N S J N J A J A E J D J L P T J V J E L J Q J G J V V P R

| #1 | b*         | b <sup>2+</sup> | b <sup>3+</sup> | b <sup>4+</sup> | Seq. | y*         | y <sup>2+</sup> | y <sup>3+</sup> | y <sup>4+</sup> | #2 |
|----|------------|-----------------|-----------------|-----------------|------|------------|-----------------|-----------------|-----------------|----|
| 1  | 102.05496  | 51.53112        | 34.68984        | 26.26920        | T    |            |                 |                 |                 | 32 |
| 2  | 173.09208  | 87.04968        | 58.36888        | 44.02848        | A    | 3246.66159 | 1623.83443      | 1082.89205      | 812.42086       | 31 |
| 3  | 320.16050  | 160.58389       | 107.39168       | 80.79558        | F    | 3175.62447 | 1588.31587      | 1059.21301      | 794.66158       | 30 |
| 4  | 377.18197  | 189.09462       | 126.39884       | 95.05095        | G    | 3028.55605 | 1514.78166      | 1010.19020      | 757.89447       | 29 |
| 5  | 434.20344  | 217.60536       | 145.40600       | 109.30632       | G    | 2971.53458 | 1486.27093      | 991.18304       | 743.63910       | 28 |
| 6  | 590.30456  | 295.65592       | 197.43970       | 148.33160       | R    | 2914.51311 | 1457.76019      | 972.17589       | 729.38374       | 27 |
| 7  | 746.40568  | 373.70648       | 249.47341       | 187.35688       | R    | 2758.41199 | 1379.70963      | 920.14218       | 690.35846       | 26 |
| 8  | 817.44280  | 409.22504       | 273.15245       | 205.11616       | A    | 2602.31087 | 1301.65907      | 868.10847       | 651.33318       | 25 |
| 9  | 916.51122  | 458.75925       | 306.17526       | 229.88326       | V    | 2531.27375 | 1266.14051      | 844.42943       | 633.57390       | 24 |
| 10 | 1013.56399 | 507.28563       | 338.52618       | 254.14645       | P    | 2432.20533 | 1216.60630      | 811.40663       | 608.80679       | 23 |
| 11 | 1110.61676 | 555.81202       | 370.87710       | 278.40965       | P    | 2335.15256 | 1168.07992      | 779.05570       | 584.54360       | 22 |
| 12 | 1224.65969 | 612.83348       | 408.89141       | 306.92038       | N    | 2238.09979 | 1119.55353      | 746.70478       | 560.28041       | 21 |
| 13 | 1338.70262 | 669.85495       | 446.90572       | 335.43111       | N    | 2124.05686 | 1062.53207      | 708.69047       | 531.76967       | 20 |
| 14 | 1425.73465 | 713.37096       | 475.91640       | 357.18912       | S    | 2010.01393 | 1005.51060      | 670.67616       | 503.25894       | 19 |
| 15 | 1539.77758 | 770.39243       | 513.93071       | 385.69985       | N    | 1922.98190 | 961.99459       | 641.66548       | 481.50093       | 18 |
| 16 | 1610.81470 | 805.91099       | 537.60975       | 403.45913       | A    | 1808.93897 | 904.97312       | 603.65117       | 452.99020       | 17 |
| 17 | 1681.85182 | 841.42955       | 561.28879       | 421.21841       | A    | 1737.90185 | 869.45456       | 579.97213       | 435.23092       | 16 |
| 18 | 1810.89442 | 905.95085       | 604.30299       | 453.47906       | E    | 1666.86473 | 833.93600       | 556.29309       | 417.47164       | 15 |
| 19 | 1925.92137 | 963.46432       | 642.64531       | 482.23580       | D    | 1537.82213 | 769.41470       | 513.27889       | 385.21095       | 14 |
| 20 | 2040.94832 | 1020.97780      | 680.98762       | 510.99254       | D    | 1422.79518 | 711.90123       | 474.93658       | 356.45425       | 13 |
| 21 | 2154.03239 | 1077.51983      | 718.68231       | 539.26355       | L    | 1307.76823 | 654.38775       | 436.59426       | 327.69752       | 12 |
| 22 | 2251.08516 | 1126.04622      | 751.03324       | 563.52675       | P    | 1194.68416 | 597.84572       | 398.89957       | 299.42850       | 11 |
| 23 | 2352.13284 | 1176.57006      | 784.71580       | 588.78867       | T    | 1097.63139 | 549.31933       | 366.54865       | 275.16331       | 10 |
| 24 | 2451.20126 | 1226.10427      | 817.73860       | 613.55577       | V    | 996.58371  | 498.79549       | 332.86609       | 249.90139       | 9  |
| 25 | 2580.24386 | 1290.62557      | 860.75280       | 645.81642       | E    | 897.51529  | 449.26128       | 299.84328       | 225.13428       | 8  |
| 26 | 2693.32793 | 1347.16760      | 898.44749       | 674.08744       | L    | 768.47269  | 384.73998       | 256.82008       | 192.87363       | 7  |
| 27 | 2821.38651 | 1411.19689      | 941.13369       | 706.10208       | Q    | 655.38862  | 328.19795       | 219.13439       | 164.60261       | 6  |
| 28 | 2878.40798 | 1439.70763      | 960.14084       | 720.35745       | G    | 527.33004  | 264.16866       | 176.44820       | 132.58797       | 5  |
| 29 | 2977.47640 | 1489.24184      | 993.16365       | 745.12456       | V    | 470.30857  | 235.65792       | 157.44104       | 118.33260       | 4  |
| 30 | 3076.54482 | 1538.77605      | 1026.18646      | 769.89166       | V    | 371.24015  | 186.12371       | 124.41823       | 93.56550        | 3  |
| 31 | 3173.59759 | 1587.30243      | 1058.53738      | 794.15485       | P    | 272.17173  | 136.58950       | 91.39543        | 68.79839        | 2  |
| 32 |            |                 |                 |                 | R    | 175.11896  | 88.06312        | 59.04450        | 44.53520        | 1  |



e

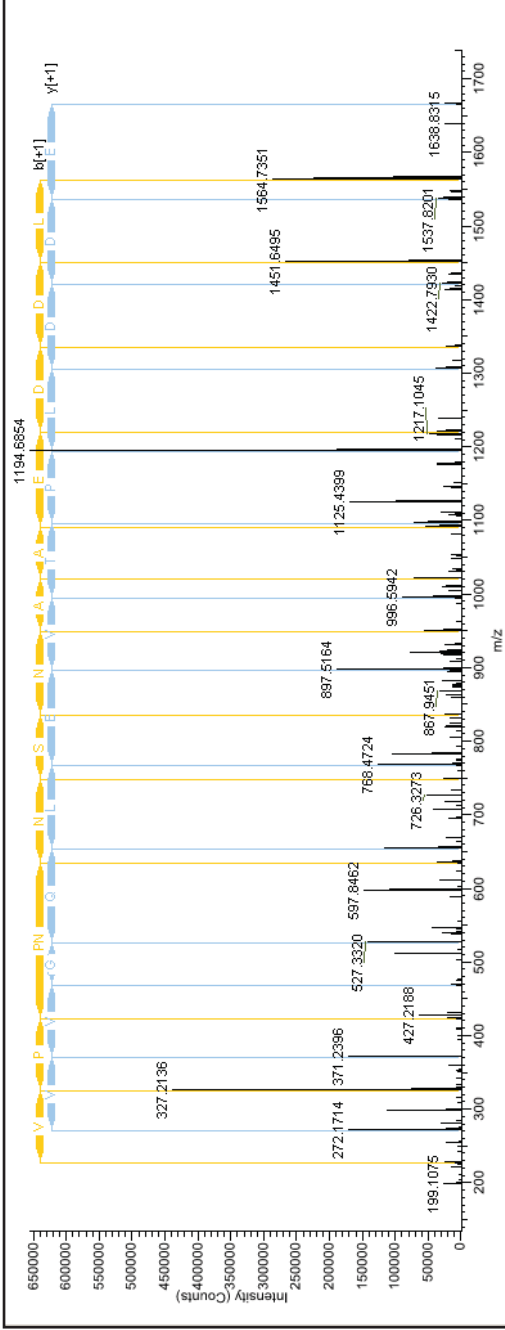

R A V V P P N J N S J N J A A E S D D L L P T V E L Q G V V P R

| #1 | b*         | b <sup>2+</sup> | b <sup>3+</sup> | Seq. | y*         | y <sup>2+</sup> | y <sup>3+</sup> | #2 |
|----|------------|-----------------|-----------------|------|------------|-----------------|-----------------|----|
| 1  | 157.10840  | 79.05784        | 53.04098        | R    |            |                 |                 | 26 |
| 2  | 228.14552  | 114.57640       | 76.72002        | A    | 2602.31087 | 1301.65907      | 868.10847       | 25 |
| 3  | 327.21394  | 164.11061       | 109.74283       | V    | 2531.27375 | 1266.14051      | 844.42943       | 24 |
| 4  | 424.26671  | 212.63699       | 142.09375       | P    | 2432.20533 | 1216.60630      | 811.40663       | 23 |
| 5  | 521.31948  | 261.16338       | 174.44468       | P    | 2335.15256 | 1168.07992      | 779.05570       | 22 |
| 6  | 635.36241  | 318.18484       | 212.45899       | N    | 2238.09979 | 1119.55353      | 746.70478       | 21 |
| 7  | 749.40534  | 375.20631       | 250.47330       | N    | 2124.05686 | 1062.53207      | 708.69047       | 20 |
| 8  | 836.43737  | 418.72232       | 279.48397       | S    | 2010.01393 | 1005.51060      | 670.67616       | 19 |
| 9  | 950.48030  | 475.74379       | 317.49828       | N    | 1922.98190 | 961.99459       | 641.66548       | 18 |
| 10 | 1021.51742 | 511.26235       | 341.17732       | A    | 1808.93897 | 904.97312       | 603.65117       | 17 |
| 11 | 1092.55454 | 546.78091       | 364.86636       | A    | 1737.90185 | 869.45456       | 579.97213       | 16 |
| 12 | 1221.59714 | 611.30221       | 407.87056       | E    | 1666.86473 | 833.93600       | 556.29309       | 15 |
| 13 | 1336.62409 | 668.81568       | 446.21288       | D    | 1537.82213 | 769.41470       | 513.27889       | 14 |
| 14 | 1451.65104 | 726.32916       | 484.55520       | D    | 1422.79518 | 711.90123       | 474.93658       | 13 |
| 15 | 1564.73511 | 782.87119       | 522.24989       | L    | 1307.76823 | 654.38775       | 436.59426       | 12 |
| 16 | 1661.78788 | 831.39758       | 554.60081       | P    | 1194.68416 | 597.84572       | 398.89957       | 11 |
| 17 | 1762.83556 | 881.92142       | 588.28337       | T    | 1097.63139 | 549.31933       | 366.54865       | 10 |
| 18 | 1861.90398 | 931.45563       | 621.30618       | V    | 996.58371  | 498.79549       | 332.86609       | 9  |
| 19 | 1990.94658 | 995.97693       | 664.32038       | E    | 897.51529  | 449.26128       | 299.84328       | 8  |
| 20 | 2104.03065 | 1052.51896      | 702.01507       | L    | 768.47269  | 384.73998       | 256.82908       | 7  |
| 21 | 2232.08923 | 1116.54825      | 744.70126       | Q    | 655.38862  | 328.19795       | 219.13439       | 6  |
| 22 | 2289.11070 | 1145.05899      | 763.70842       | G    | 527.33004  | 264.16866       | 176.44820       | 5  |
| 23 | 2388.17912 | 1194.59320      | 796.73122       | V    | 470.30857  | 235.65792       | 157.44104       | 4  |
| 24 | 2487.24754 | 1244.12741      | 829.75403       | V    | 371.24015  | 186.12371       | 124.41823       | 3  |
| 25 | 2584.30031 | 1292.65379      | 862.10495       | P    | 272.17173  | 136.58950       | 91.39543        | 2  |
| 26 |            |                 |                 | R    | 175.11896  | 88.06312        | 59.04450        | 1  |
