# Supplementary material for: Activation peptide of the coagulation factor XIII (AP-F13A1) as a new biomarker for the screening of colorectal cancer
Source: PubMed Central journal article supplement (PMC5890357; doi:10.1186/s12014-018-9191-3), 2018-04-09

## **Additional file 6**

### **Coefficients of Variation (CVs) of the ratios light/heavy**

CVs of the light/heavy peptides ratios calculated for each points of the calibration curve (Panel A), 120 injections across 40 biological replicates from the biobank 1 (Panel B) and 219 injections across 73 biological replicates from the biobank 2 (Panel C).

**Panel A** - CVs of the light/heavy ratios calculated for AVPPNNSNAAEDDLPTVELQGVVPR peptide and AVPPNNSNAAEDDLPTVELQGLVPR peptide used for the establishment of the standard concentration curves in the serum (**a, b**).

**Panel B** - CVs of the light/heavy ratios calculated for AVPPNNSNAAEDDLPTVELQGVVPR peptide and AVPPNNSNAAEDDLPTVELQGLVPR peptide for individual patients of the biobank 1 (**a, b**). Distribution of the CVs of the light/heavy ratios for the two peptides over 40 biological replicates (**c**).

**Panel C** - CVs of the light/heavy ratios calculated for AVPPNNSNAAEDDLPTVELQGVVPR peptide and AVPPNNSNAAEDDLPTVELQGLVPR peptide for individual patients of the biobank 2 (**a, b**). Distribution of the CVs of the light/heavy ratios for the two peptides over 73 biological replicates (**c**).

# Panel A

**a**

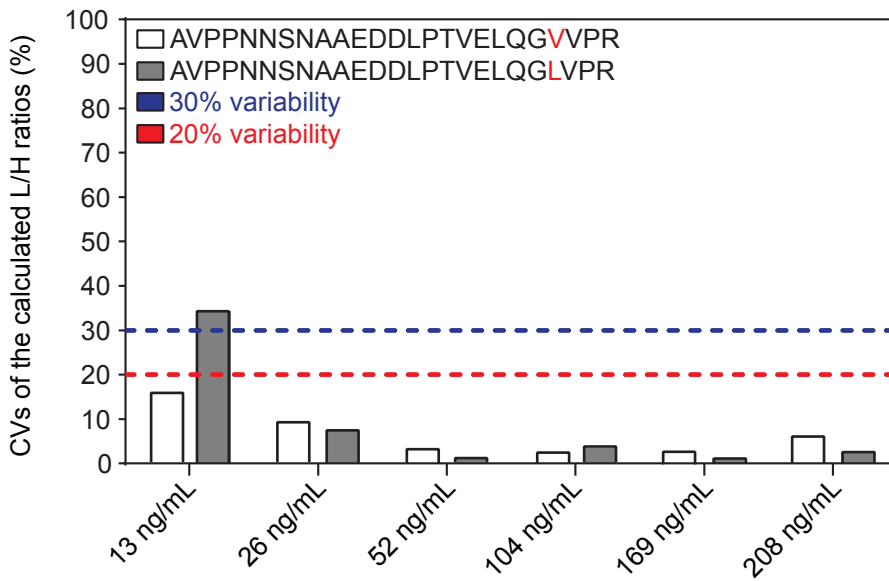

**b**

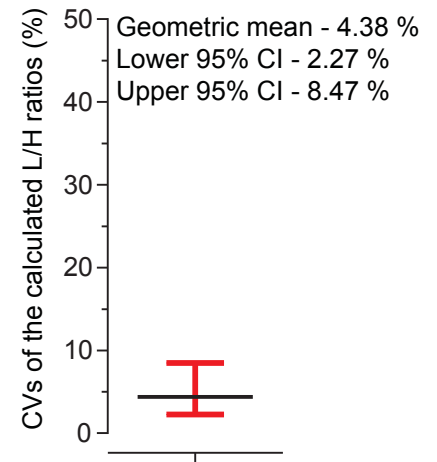

# Panel B

**a**

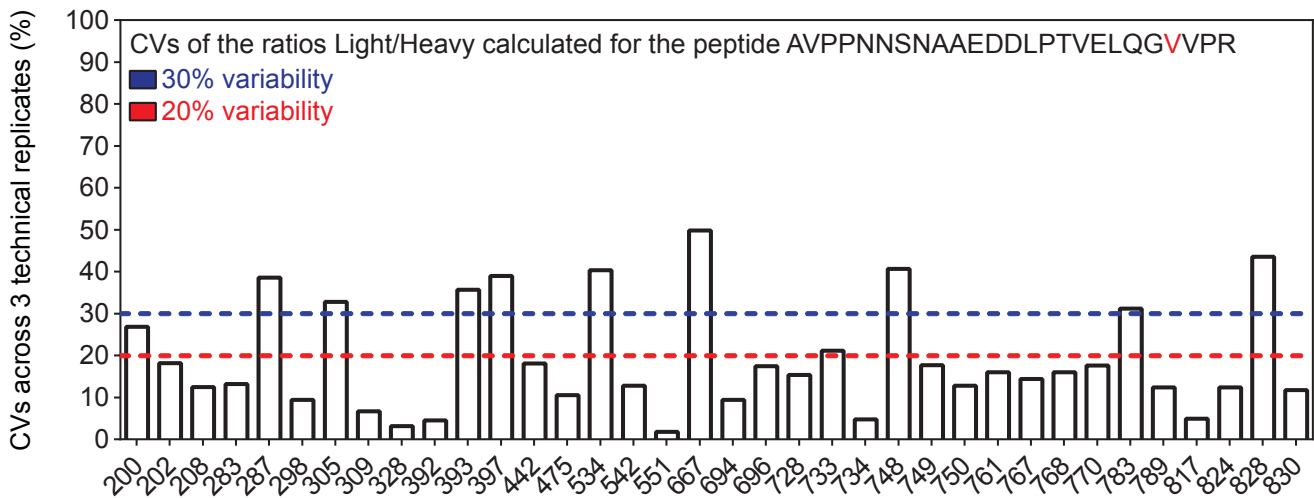

**b**

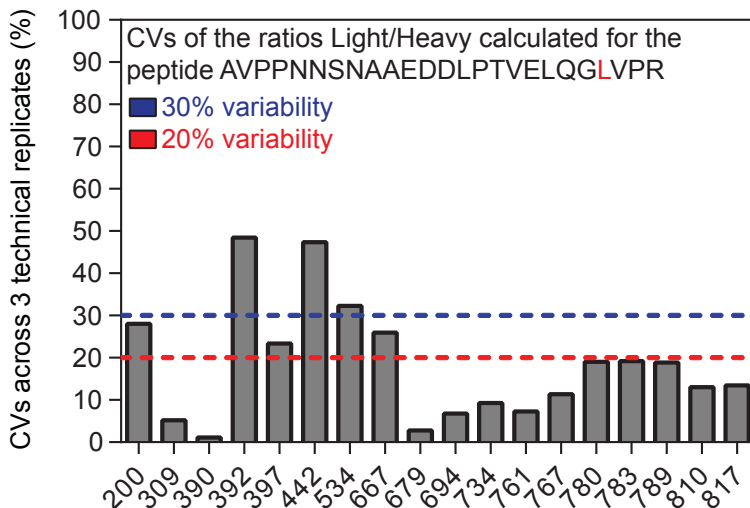

**c**

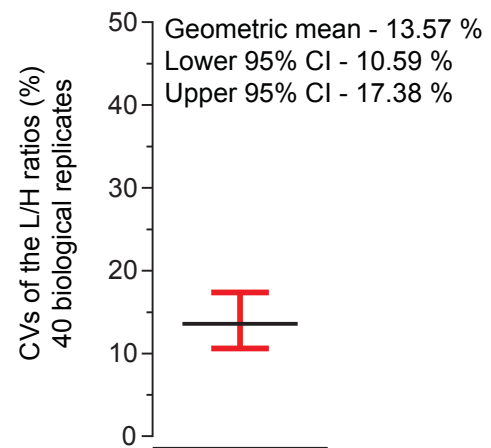

# Panel C

**a**

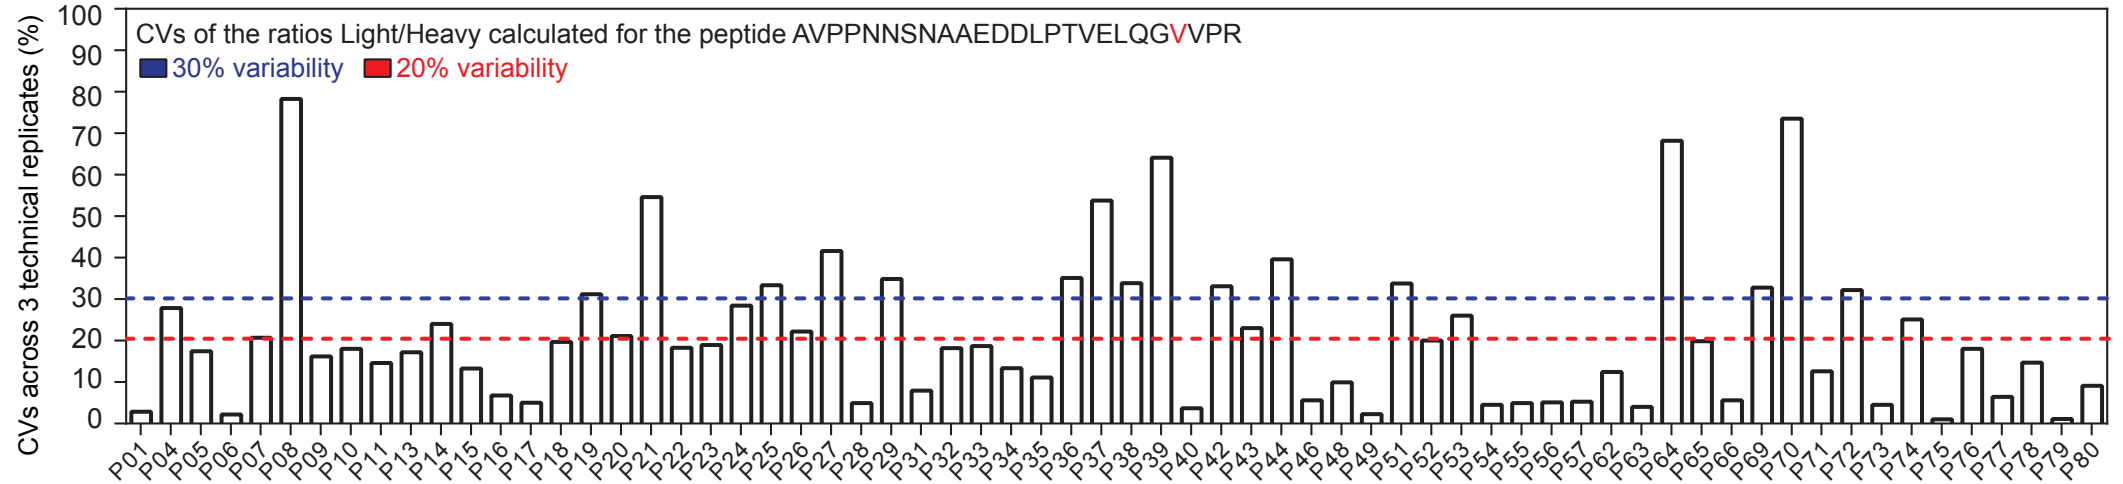

**b**

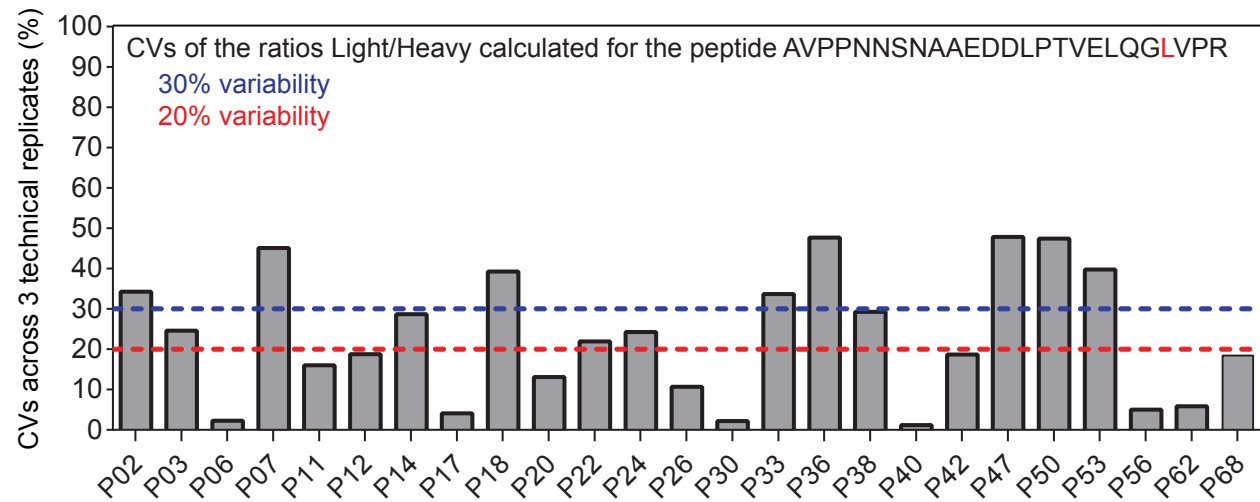

**c**

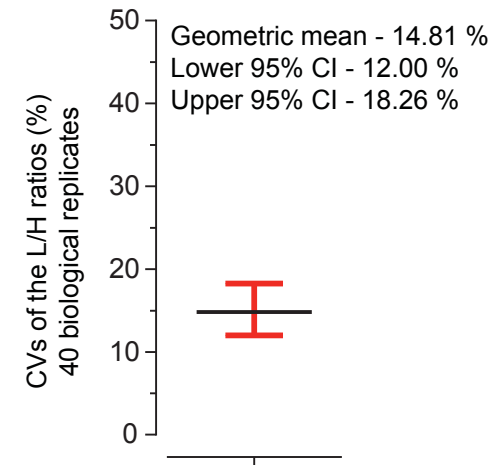

Supplement: 12014_2018_9191_MOESM6_ESM.pdf [file 12014_2018_9191_MOESM6_ESM.pdf]
