# Supplementary material for: Activation peptide of the coagulation factor XIII (AP-F13A1) as a new biomarker for the screening of colorectal cancer
Source: PubMed Central journal article supplement (PMC5890357; doi:10.1186/s12014-018-9191-3), 2018-04-09
Supplement: 12014_2018_9191_MOESM7_ESM.pdf [file 12014_2018_9191_MOESM7_ESM.pdf]

## **Supplementary table 2**

### **Table summary of patients selected for the absolute quantification of the two isoforms of tAP-F13A1 by LC-PRM**

Calculated concentration of tAP-F13A1 of individual healthy patients and patients. **(a)** Table of calculated concentration of the 40 patients extracted from the first biological biobank. **(b)** Table of calculated concentrations of the 73 patients extracted from the second biological biobank. The term “-” indicates that one of the tAP-F13A1 isoform is not detected during mass spectrometry analysis and analysis in the skyline software.

**a**

| Replicate Name | Classification | Experimental concentration of<br>AVPPNNSNAAEDDLPTVELQGVVPR<br>(ng/mL) | Experimental concentration of<br>AVPPNNSNAAEDDLPTVELQGLVPR<br>(ng/mL) | Sum of 2 variants (ng/mL) |
|----------------|----------------|-----------------------------------------------------------------------|-----------------------------------------------------------------------|---------------------------|
| 283            | Control        | 110.4                                                                 | -                                                                     | 110.4                     |
| 287            | Control        | 164.3                                                                 | -                                                                     | 164.3                     |
| 305            | Control        | 256.9                                                                 | -                                                                     | 256.9                     |
| 309            | Control        | 59.3                                                                  | 43.0                                                                  | 102.3                     |
| 390            | Control        | -                                                                     | 230.6                                                                 | 230.6                     |
| 392            | Control        | 95.5                                                                  | 42.2                                                                  | 137.8                     |
| 393            | Control        | 223.9                                                                 | -                                                                     | 223.9                     |
| 397            | Control        | 119.2                                                                 | 44.7                                                                  | 163.9                     |
| 442            | Control        | 191.8                                                                 | 47.4                                                                  | 239.2                     |
| 475            | Control        | 222.3                                                                 | -                                                                     | 222.3                     |
| 534            | Control        | 144.3                                                                 | 73.0                                                                  | 217.3                     |
| 542            | Control        | 370.2                                                                 | -                                                                     | 370.2                     |
| 679            | Control        | -                                                                     | 88.6                                                                  | 88.6                      |
| 696            | Control        | 189.6                                                                 | -                                                                     | 189.6                     |
| 728            | Control        | 203.4                                                                 | -                                                                     | 203.4                     |
| 733            | Control        | 137.5                                                                 | -                                                                     | 137.5                     |
| 748            | Control        | 61.4                                                                  | -                                                                     | 61.4                      |
| 749            | Control        | 171.8                                                                 | -                                                                     | 171.8                     |
| 750            | Control        | 220.2                                                                 | -                                                                     | 220.2                     |
| 761            | Control        | 83.6                                                                  | 42.0                                                                  | 125.6                     |
| 810            | Control        | 93.9                                                                  | -                                                                     | 93.9                      |
| 200            | Cancer         | 44.3                                                                  | 14.8                                                                  | 59.1                      |
| 202            | Cancer         | 129.1                                                                 | -                                                                     | 129.1                     |
| 208            | Cancer         | 31.0                                                                  | -                                                                     | 31.0                      |
| 298            | Cancer         | 86.5                                                                  | 46.4                                                                  | 132.9                     |
| 328            | Cancer         | 50.7                                                                  | -                                                                     | 50.7                      |
| 551            | Cancer         | 51.3                                                                  | -                                                                     | 51.3                      |
| 667            | Cancer         | 37.3                                                                  | -                                                                     | 37.3                      |
| 694            | Cancer         | 32.1                                                                  | 14.2                                                                  | 46.2                      |
| 734            | Cancer         | 88.7                                                                  | -                                                                     | 88.7                      |
| 767            | Cancer         | 57.0                                                                  | 32.3                                                                  | 89.3                      |
| 768            | Cancer         | 53.2                                                                  | 25.3                                                                  | 78.5                      |
| 770            | Cancer         | 21.7                                                                  | -                                                                     | 21.7                      |
| 780            | Cancer         | -                                                                     | 42.8                                                                  | 42.8                      |
| 783            | Cancer         | 33.7                                                                  | 18.0                                                                  | 51.8                      |
| 789            | Cancer         | 63.2                                                                  | -                                                                     | 63.2                      |
| 817            | Cancer         | 25.9                                                                  | 11.4                                                                  | 37.3                      |
| 824            | Cancer         | 17.0                                                                  | -                                                                     | 17.0                      |
| 828            | Cancer         | 46.4                                                                  | -                                                                     | 46.4                      |
| 830            | Cancer         | -                                                                     | 19.9                                                                  | 19.9                      |

**b**

| Replicate Name | Classification | Experimental concentration of       | Experimental concentration of        | Sum of 2 variants (ng/mL) |
|----------------|----------------|-------------------------------------|--------------------------------------|---------------------------|
|                |                | AVPPNNSNAAEDDLPTVELQGVPR<br>(ng/mL) | AVPPNNSNAAEDDLPTVELQGLVPR<br>(ng/mL) |                           |
| P01 - VAL370   | Control        | 148.7                               |                                      | 148.693                   |
| P02 - VAL373   | Control        |                                     | 102.7                                | 102.680                   |
| P03 - VAL378   | Control        |                                     | 110.9                                | 110.919                   |
| P04 - VAL380   | Control        | 137.5                               |                                      | 137.455                   |
| P05 - VAL400   | Control        | 148.1                               |                                      | 148.126                   |
| P09 - VAL413   | Control        | 197.4                               |                                      | 197.425                   |
| P10 - VAL414   | Control        | 465.1                               |                                      | 465.147                   |
| P11 - VAL423   | Control        | 89.8                                | 38.9                                 | 128.720                   |
| P012 - VAL424  | Control        |                                     | 153.6                                | 153.645                   |
| P013 - VAL425  | Control        | 103.3                               |                                      | 103.315                   |
| P014 - VAL426  | Control        | 48.6                                | 206.9                                | 255.461                   |
| P015 - VAL427  | Control        | 153.8                               |                                      | 153.816                   |
| P016 - VAL433  | Control        | 144.1                               |                                      | 144.137                   |
| P017 - VAL435  | Control        | 90.1                                | 99.1                                 | 189.169                   |
| P18 - VAL437   | Control        | 47.8                                | 48.3                                 | 96.111                    |
| P19 - VAL444   | Control        | 174.4                               |                                      | 174.412                   |
| P20 - VAL448   | Control        | 110.4                               | 82.4                                 | 192.786                   |
| P21 - VAL488   | Control        | 262.8                               |                                      | 262.776                   |
| P22 - VAL497   | Control        | 111.5                               | 133.1                                | 244.641                   |
| P23 - VAL498   | Control        | 230.3                               |                                      | 230.324                   |
| P25 - VAL505   | Control        | 205.2                               |                                      | 205.185                   |
| P26 - VAL511   | Control        | 77.5                                | 62.5                                 | 140.065                   |
| P27 - VAL512   | Control        | 245.6                               |                                      | 245.594                   |
| P28 - VAL514   | Control        | 187.7                               |                                      | 187.750                   |
| P42 - VAL010   | Control        | 70.1                                | 74.3                                 | 144.433                   |
| P43 - VAL100   | Control        | 322.4                               |                                      | 322.373                   |
| P44 - VAL105   | Control        | 432.4                               |                                      | 432.415                   |
| P47 - VAL116   | Control        |                                     | 145.3                                | 145.328                   |
| P48 - VAL117   | Control        | 137.1                               |                                      | 137.051                   |
| P49 - VAL119   | Control        | 476.9                               |                                      | 476.866                   |
| P50 - VAL121   | Control        |                                     | 53.9                                 | 53.933                    |
| P51 - VAL122   | Control        | 153.6                               |                                      | 153.606                   |
| P52 - VAL127   | Control        | 159.4                               |                                      | 159.399                   |
| P53 - VAL129   | Control        | 39.0                                | 25.1                                 | 64.071                    |
| P54 - VAL133   | Control        | 106.0                               |                                      | 105.981                   |
| P55 - VAL135   | Control        | 231.9                               |                                      | 231.926                   |
| P56 - VAL136   | Control        | 164.4                               | 80.4                                 | 244.849                   |
| P57 - VAL141   | Control        | 195.7                               |                                      | 195.737                   |
| P62 - VAL150   | Control        | 161.7                               | 118.0                                | 279.733                   |
| P63 - VAL151   | Control        | 199.5                               |                                      | 199.521                   |
| P75 - VAL350   | Control        | 164.1                               |                                      | 164.109                   |
| P76 - VAL352   | Control        | 178.6                               |                                      | 178.620                   |
| P77 - VAL353   | Control        | 99.0                                |                                      | 99.037                    |
| P78 - VAL355   | Control        | 100.4                               |                                      | 100.416                   |
| P79 - VAL357   | Control        | 149.0                               |                                      | 149.041                   |
| P80 - VAL362   | Control        | 156.2                               |                                      | 156.199                   |
| P31 - VAL569   | Cancer         | 106.8                               |                                      | 106.845                   |
| P65 - VAL204   | Cancer         | 60.1                                |                                      | 60.127                    |
| P66 - VAL233   | Cancer         | 67.5                                |                                      | 67.491                    |
| P69 - VAL260   | Cancer         | 33.4                                |                                      | 33.424                    |
| P07 - VAL409   | Cancer         | 47.7                                | 18.1                                 | 65.772                    |
| P24 - VAL503   | Cancer         | 71.9                                | 50.2                                 | 122.062                   |
| P29 - VAL525   | Cancer         | 95.3                                |                                      | 95.276                    |
| P30 - VAL556   | Cancer         |                                     | 132.9                                | 132.904                   |
| P34 - VAL613   | Cancer         | 107.3                               |                                      | 107.347                   |
| P35 - VAL643   | Cancer         | 38.7                                |                                      | 38.745                    |
| P36 - VAL662   | Cancer         | 54.5                                | 36.8                                 | 91.300                    |
| P71 - VAL341   | Cancer         | 28.4                                |                                      | 28.421                    |
| P72 - VAL342   | Cancer         | 29.4                                |                                      | 29.362                    |
| P74 - VAL345   | Cancer         | 39.3                                |                                      | 39.260                    |
| P06 - VAL408   | Cancer         | 34.1                                | 14.5                                 | 48.691                    |
| P32 - VAL600   | Cancer         | 112.9                               |                                      | 112.947                   |
| P33 - VAL607   | Cancer         | 53.2                                | 18.3                                 | 71.442                    |
| P37 - VAL666   | Cancer         | 75.0                                |                                      | 75.015                    |
| P39 - VAL006   | Cancer         | 28.5                                |                                      | 28.542                    |
| P40 - VAL037   | Cancer         | 75.8                                | 47.3                                 | 123.090                   |
| P46 - VAL114   | Cancer         | 118.1                               |                                      | 118.053                   |
| P08 - VAL410   | Cancer         | 35.7                                |                                      | 35.675                    |
| P38 - VAL667   | Cancer         | 52.0                                | 87.7                                 | 139.676                   |
| P64 - VAL178   | Cancer         | 37.3                                |                                      | 37.263                    |
| P68 - VAL254   | Cancer         |                                     | 22.1                                 | 22.120                    |
| P70 - VAL336   | Cancer         | 27.7                                |                                      | 27.704                    |
| P73 - VAL344   | Cancer         | 43.5                                |                                      | 43.473                    |
